# Supplementary material
Source: PubMed Central journal article supplement (PMC5994965)
Supplement: esv089_suppl_supplementary_figure_s1.pdf [file esv089_suppl_supplementary_figure_s1.pdf]

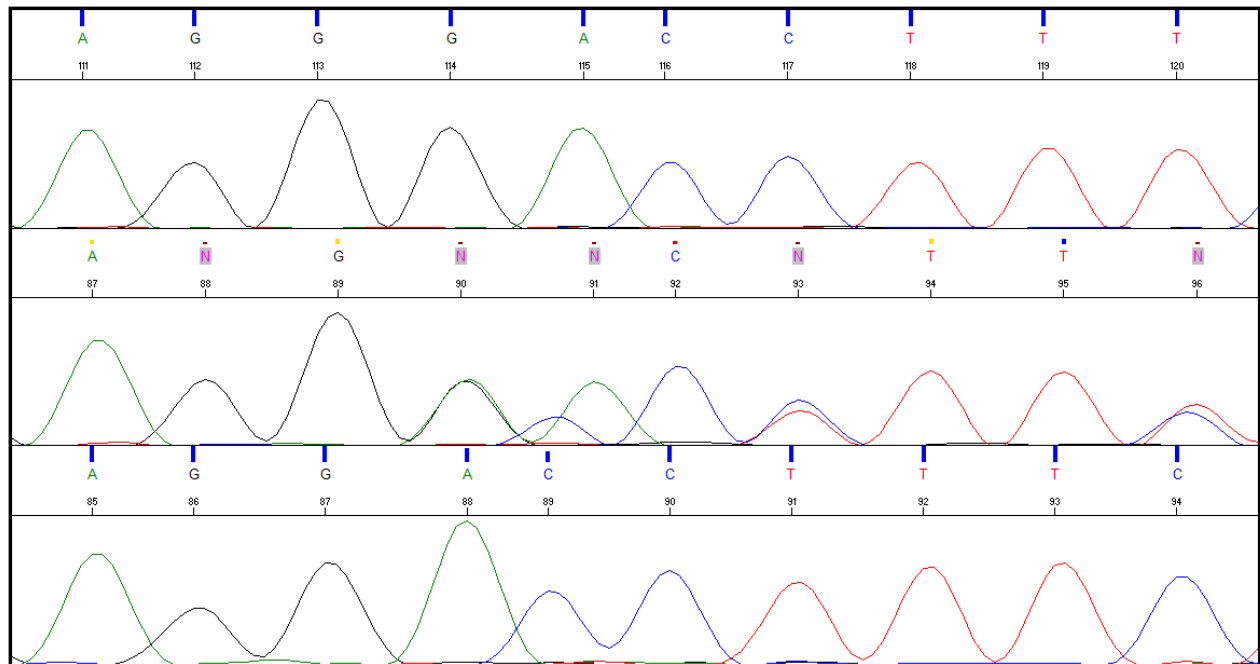

**Figure S1.** Representative chromatograms for the three *SA1A* promoter genotypes after Sanger sequencing. Top: homozygous *SA1A*<sup>+</sup>; Middle: heterozygous *SA1A*<sup>+/-97delG</sup>; Bottom: homozygous *SA1A*<sup>-97delG</sup>.
