# Supplementary material
Source: PubMed Central journal article supplement (PMC5994965)
Supplement: esv089_suppl_supplementary_figure_s2.pdf [file esv089_suppl_supplementary_figure_s2.pdf]

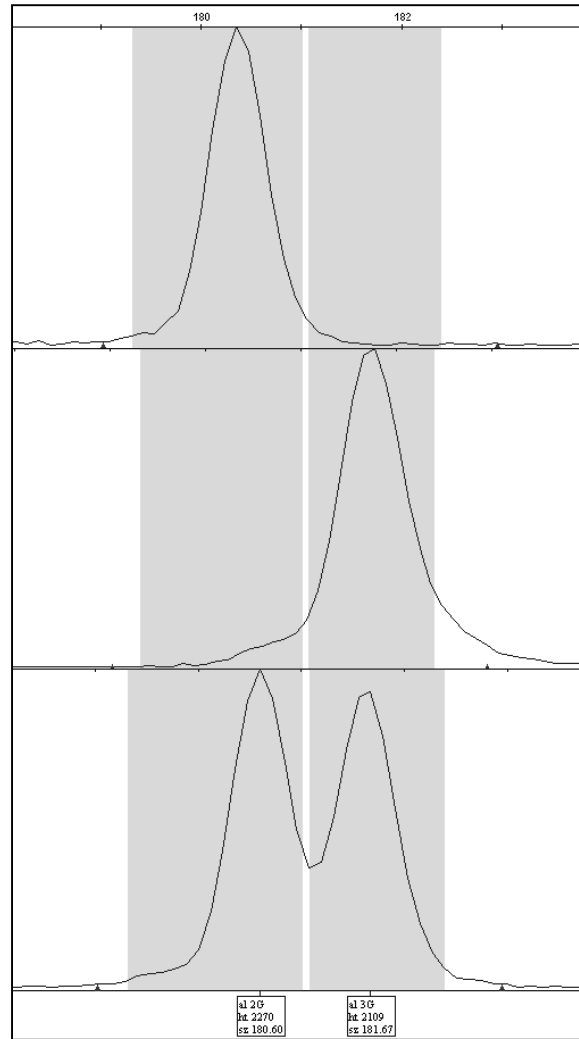

**Figure S2.** Representative output for the three *SAA1A* promoter genotypes from the ABI PRISM® 310 Genetic Analyzer. Top: homozygous  $SAA1A^{-97delG}$ ; Middle: homozygous  $SAA1A^{+}$ ; Bottom: heterozygous  $SAA1A^{+/-97delG}$ .
